# Supplementary material
Source: HighWire-hosted journal article supplement (https://ijgc.bmj.com/content/29/6/1043)

# Supplemental Figure 1: Patient disposition

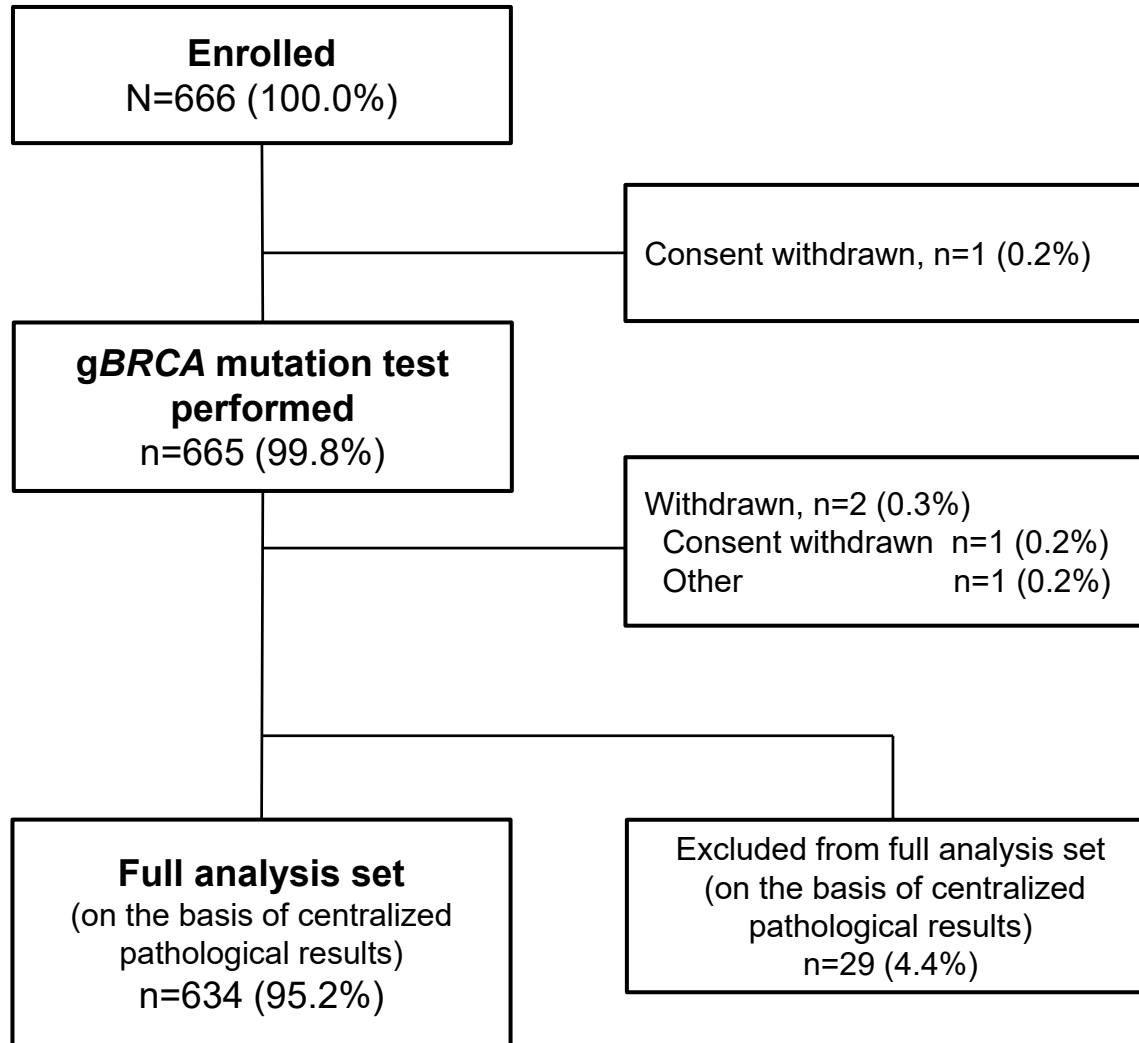

*gBRCA*, germline *BRCA*

## Supplemental Figure 2: Prevalence of gBRCA mutations in the study population by age

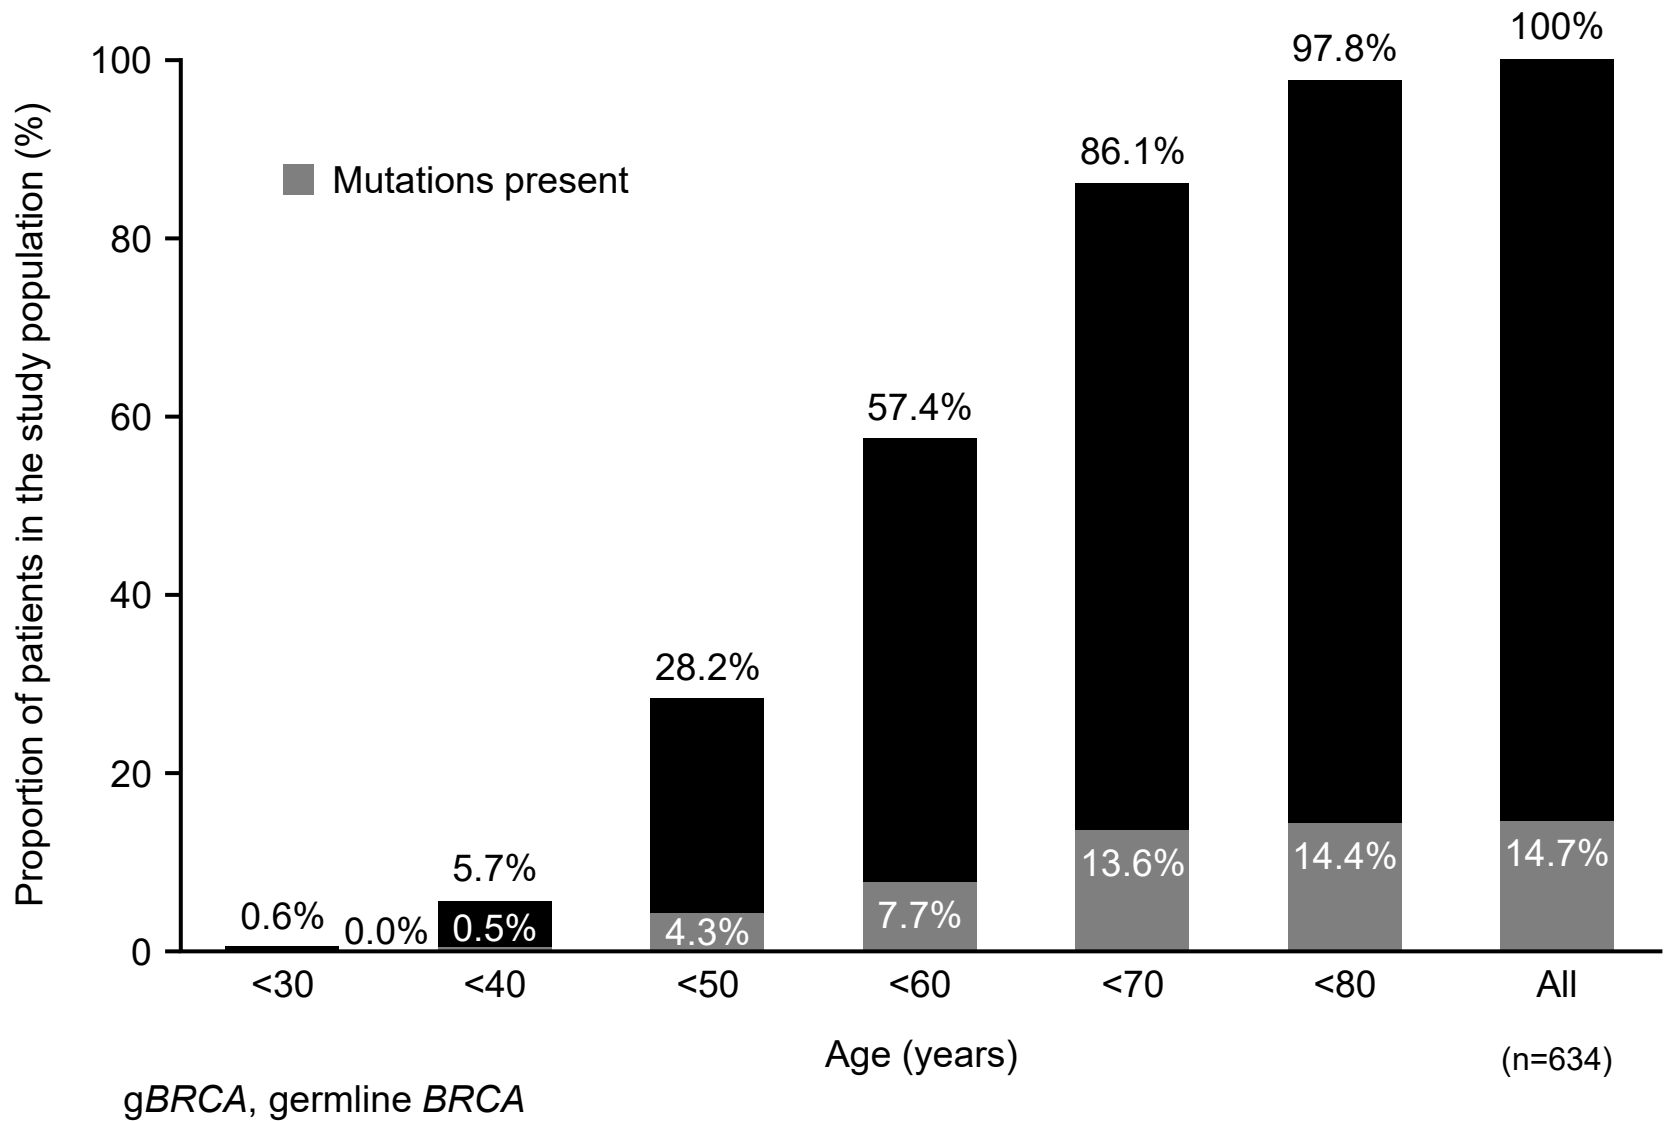

### Supplemental Figure 3: Prevalence of gBRCA mutations by cancer diagnosis (attending physician)

Epithelial ovarian cancer

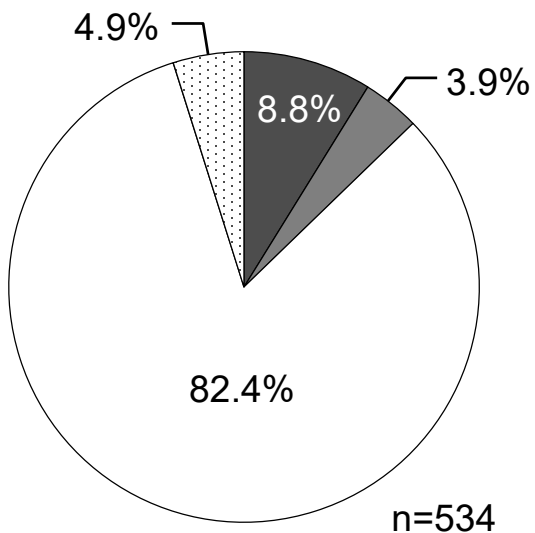

Primary peritoneal cancer

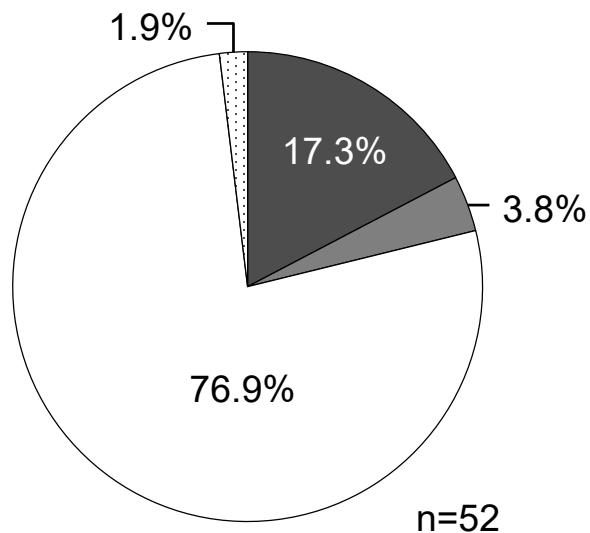

Fallopian tube cancer

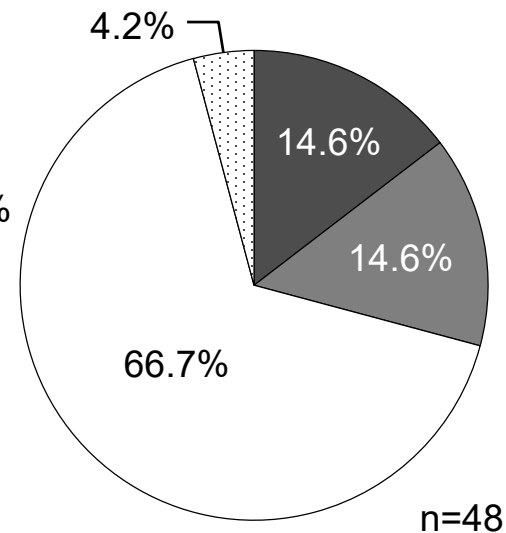

■ gBRCA1    ■ gBRCA2    □ Mutations absent    ▨ Variant of uncertain significance

gBRCA, germline BRCA

## Supplemental Figure 4: Age distribution by carcinoma type

### Epithelial ovarian cancer

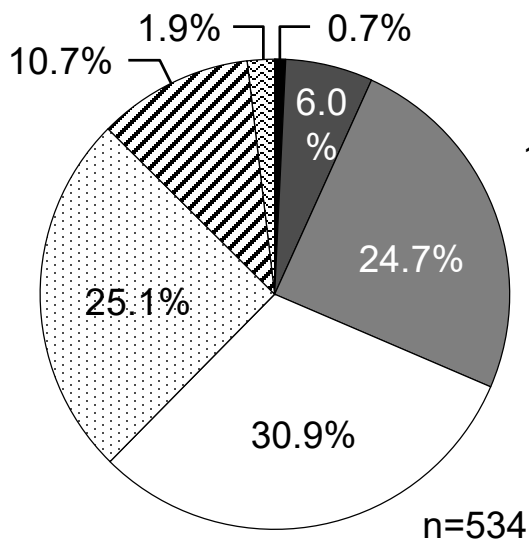

### Primary peritoneal cancer

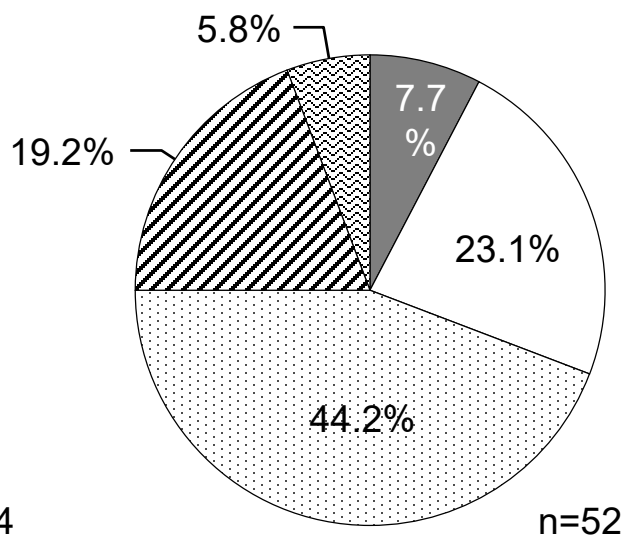

### Fallopian tube cancer

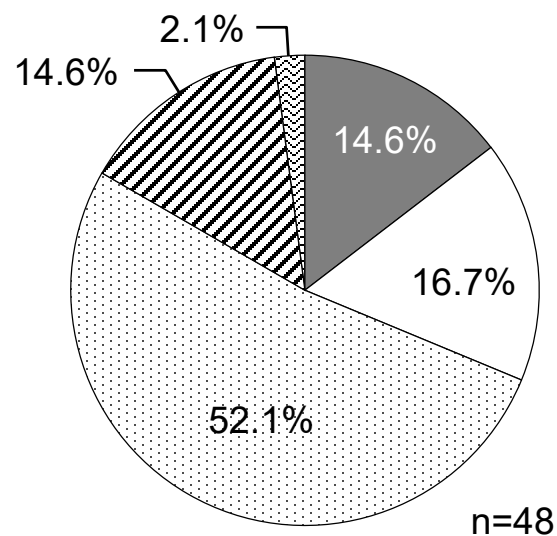

Age (years)

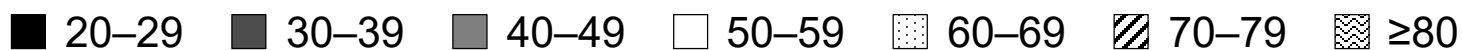

## Supplemental Figure 5: FIGO stage distribution by carcinoma type

### Epithelial ovarian cancer

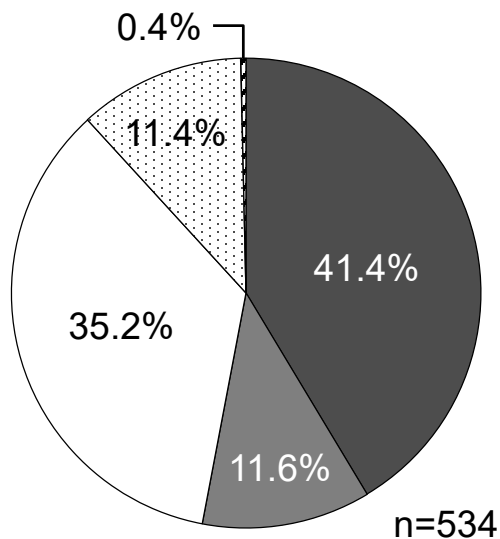

### Primary peritoneal cancer

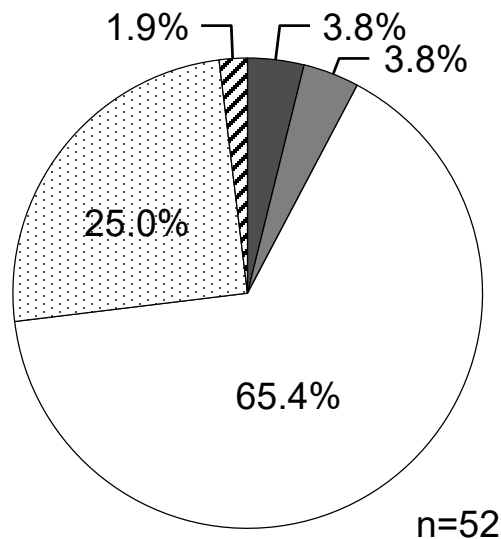

### Fallopian tube cancer

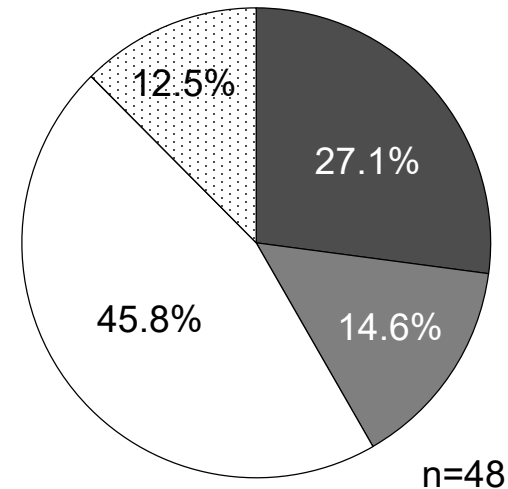

■ Stage I   ■ Stage II   □ Stage III   ▨ Stage IV   ▩ Other

# Supplemental Figure 6: Histological subtype by FIGO stage

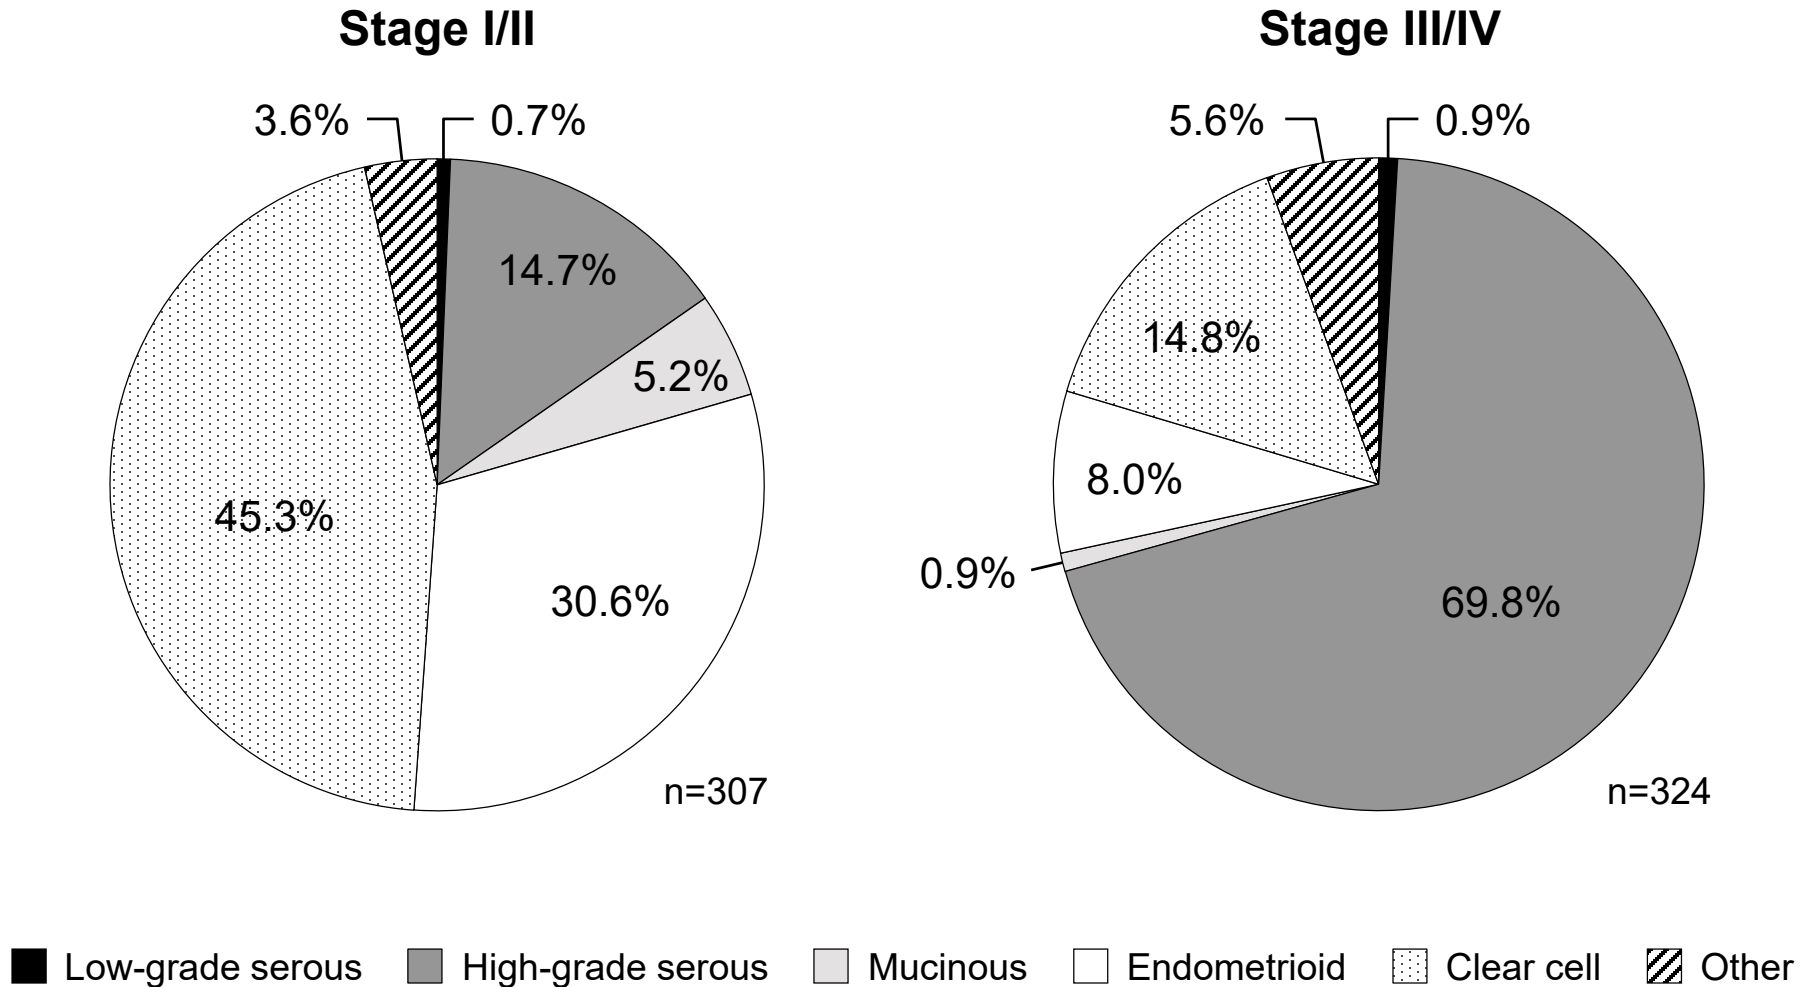

Supplement: inline-supplementary-material-2 [file inline-supplementary-material-2.pdf]
